# Supplementary material for: A Large Gene Network in Immature Erythroid Cells Is Controlled by the Myeloid and B Cell Transcriptional Regulator PU.1
Source: PubMed Central journal article supplement (PMC3111485; doi:10.1371/journal.pgen.1001392), 2011-06-09

**Figure S3 (Wontakal et. al.)**

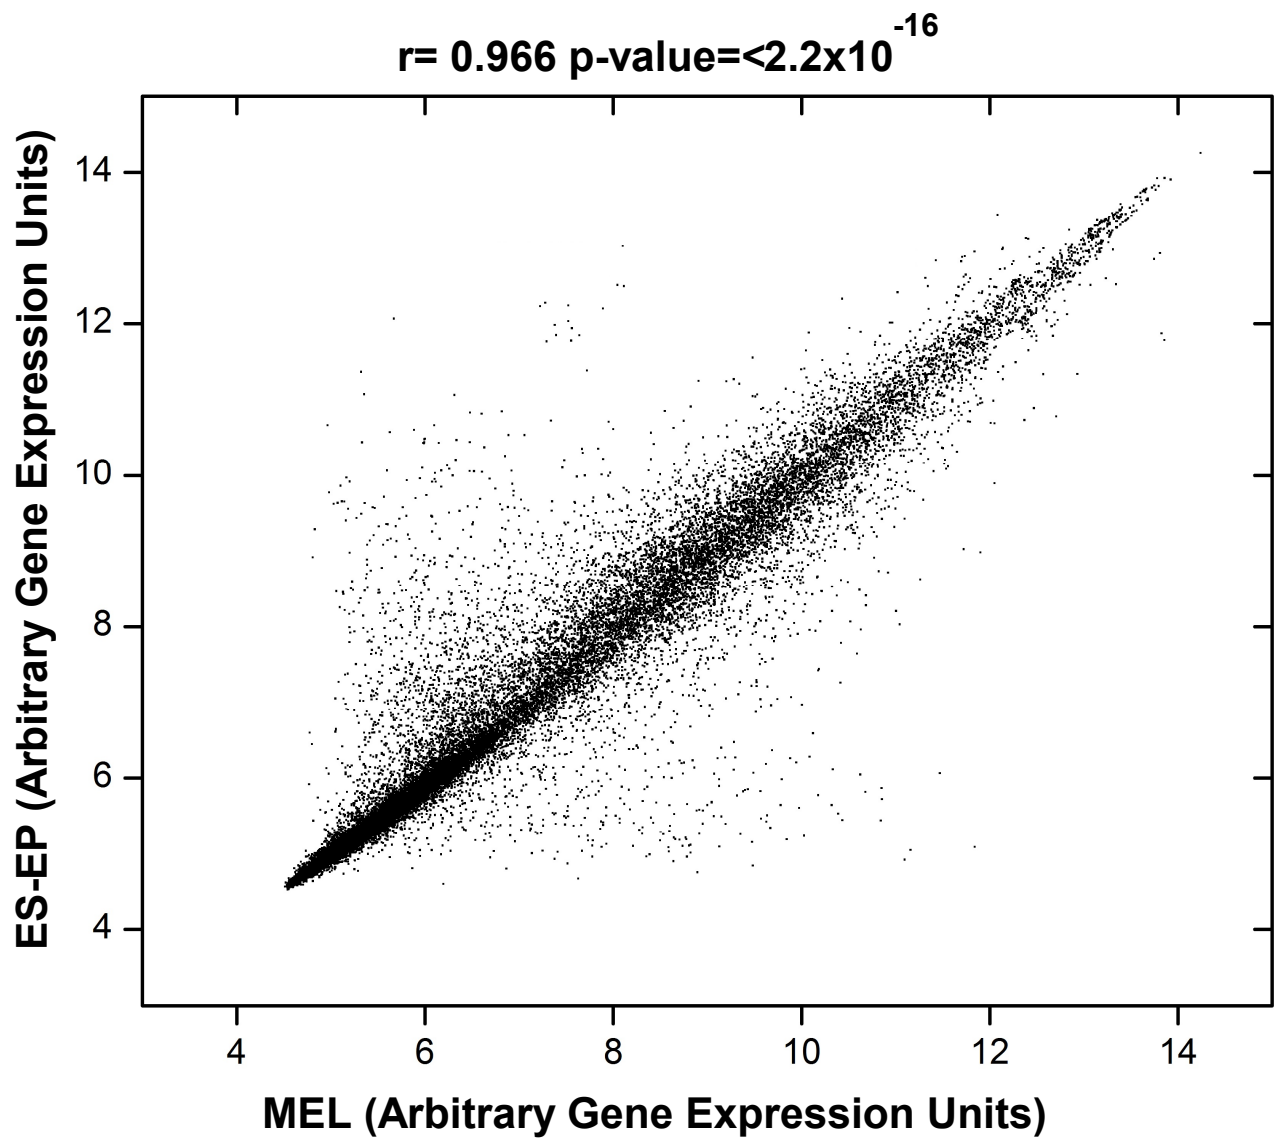

Supplement: pgen.1001392.s004.pdf [file pgen.1001392.s004.pdf]
