# Supplementary material for: A Large Gene Network in Immature Erythroid Cells Is Controlled by the Myeloid and B Cell Transcriptional Regulator PU.1
Source: PubMed Central journal article supplement (PMC3111485; doi:10.1371/journal.pgen.1001392), 2011-06-09

**Figure S5 (Wontakal et. al.)**

**A. Total Genes**

| Motif  | Observed | Expected | Log <sub>2</sub> Ratio |
|--------|----------|----------|------------------------|
| ZF5    | 50%      | 14%      | 1.82                   |
| E2F    | 38%      | 9.5%     | 2.01                   |
| AP2    | 30%      | 5.6%     | 2.42                   |
| ETF    | 22%      | 0.49%    | 5.51                   |
| CHCH   | 28%      | 5.0%     | 2.47                   |
| GC     | 22%      | 3.4%     | 2.68                   |
| Sp1    | 22%      | 3.6%     | 2.58                   |
| ABI4   | 19%      | 3.1%     | 2.59                   |
| Movo-B | 16%      | 2.0%     | 3.03                   |
| Muscle | 15%      | 5.3%     | 1.53                   |

**B.**

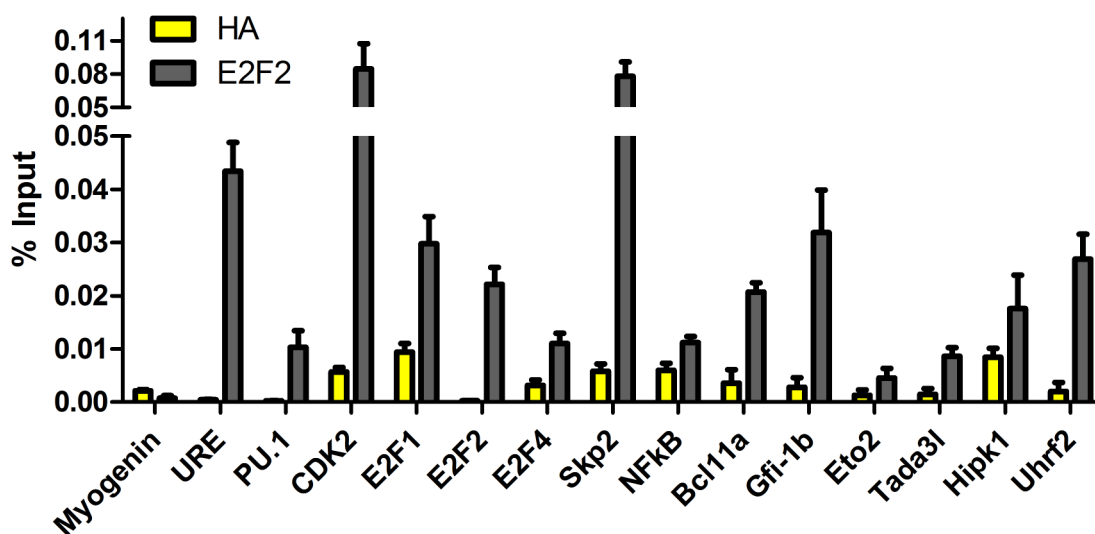

**C.**

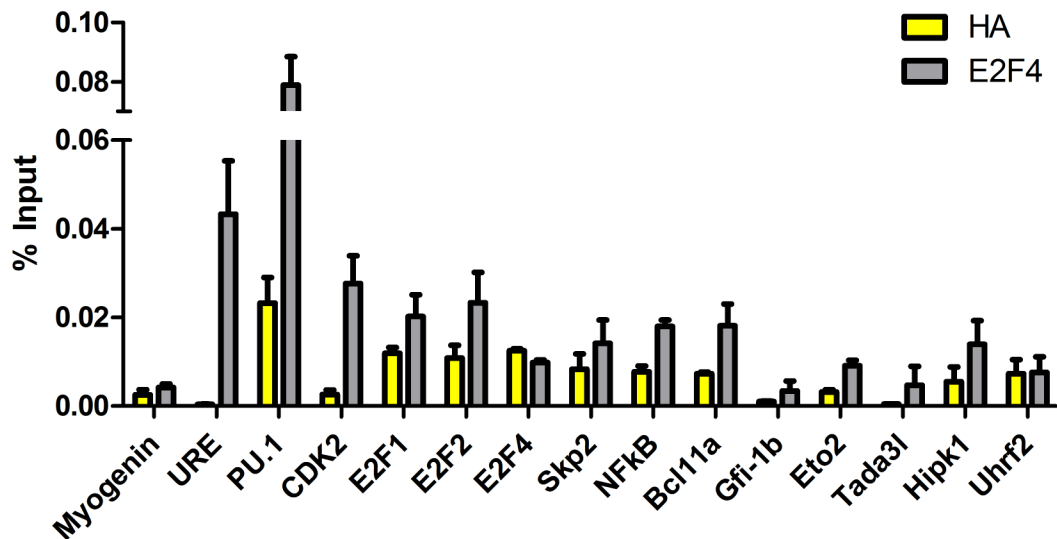

Supplement: pgen.1001392.s006.pdf [file pgen.1001392.s006.pdf]
