# Supplementary material for: A Large Gene Network in Immature Erythroid Cells Is Controlled by the Myeloid and B Cell Transcriptional Regulator PU.1
Source: PubMed Central journal article supplement (PMC3111485; doi:10.1371/journal.pgen.1001392), 2011-06-09

Figure S6 (Wontakal et. al.)

### PI3K/Akt Signaling

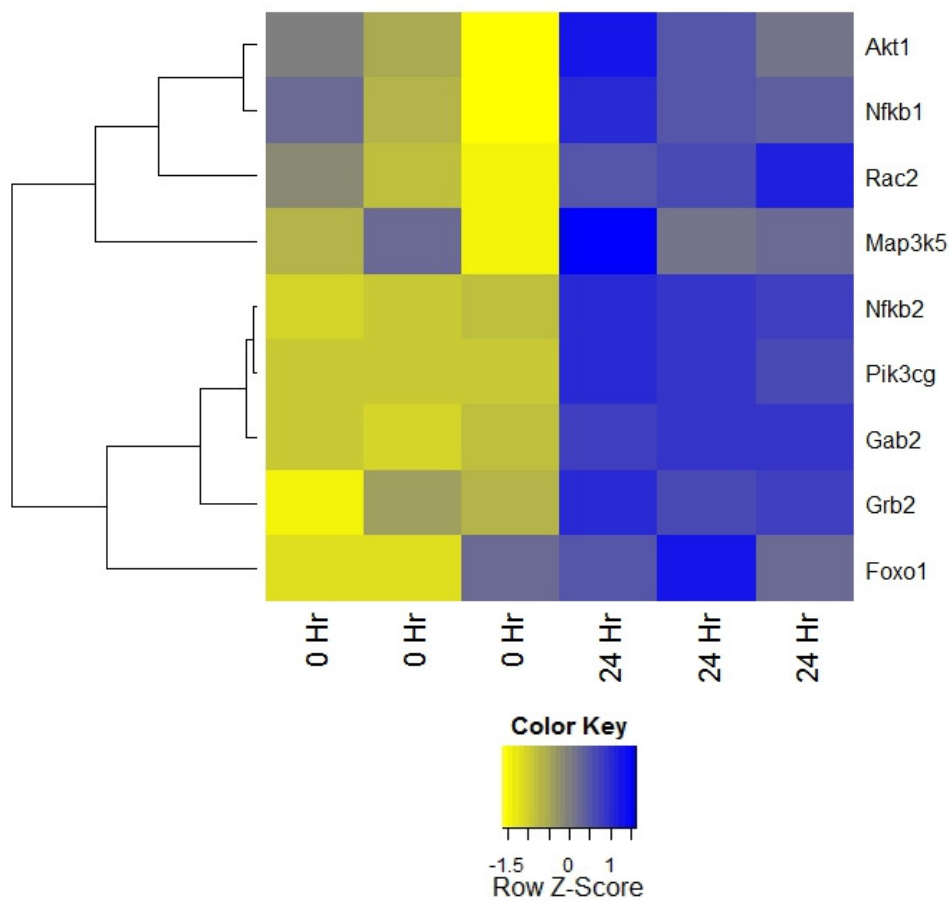

### ERK/MAPK Signaling

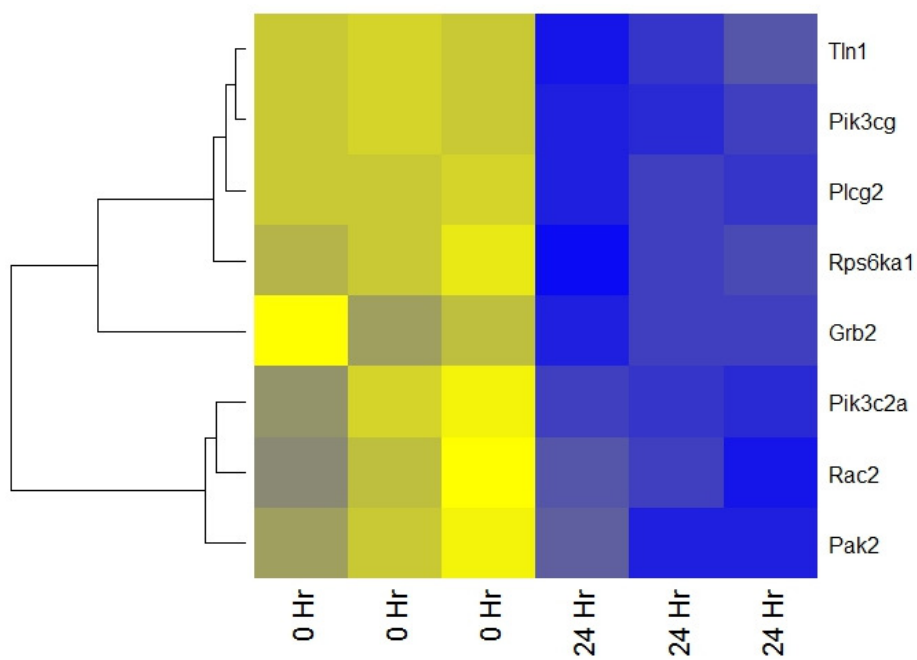

Supplement: pgen.1001392.s007.pdf [file pgen.1001392.s007.pdf]
